# Supplementary material
Source: PubMed Central journal article supplement (PMC10240955)
Supplement: freeneuropathol-03-06-3795-s1.pdf [file freeneuropathol-03-06-3795-s1.pdf]

## Supplemental methods

### *Latino demographic search terms*

- “Alzheimer’s” “neuropathology” “Latino”
- “Alzheimer’s” “neuropathology” “Hispanic”
- “Alzheimer’s” “brain pathology” “Latino”
- “Alzheimer’s” “brain pathology” “Hispanic”
- “dementia” “neuropathology” “Latino”
- “dementia” “neuropathology” “Hispanic”
- “dementia” “brain pathology” “Latino”
- “dementia” “brain pathology” “Hispanic”
- “vascular dementia” “pathology” “Latino”
- “vascular dementia” “pathology” “Hispanic”

### *Black American demographic search terms*

- “Alzheimer’s” “neuropathology” “African American”
- “Alzheimer’s” “brain pathology” “African American”
- “Alzheimer’s” “neuropathology” “Black American”
- “Alzheimer’s” “brain pathology” “Black American”
- “dementia” “neuropathology” “African American”
- “dementia” “neuropathology” “Black American”
- “dementia” “brain pathology” “African American”
- “dementia” “brain pathology” “Black American”
- “vascular dementia” “pathology” “African American”
- “vascular dementia” “pathology” “Black American”

### *Asian American demographic search terms*

- “Alzheimer’s” “neuropathology” “Asian American”
- “Alzheimer’s” “brain pathology” “Asian American”
- “dementia” “neuropathology” “Asian American”
- “dementia” “brain pathology” “Asian American”
- “vascular dementia” “pathology” “Asian American”
